# Supplementary material for: Deep carbon cycle constrained by carbonate solubility
Source: PubMed Central journal article supplement (PMC8280166; doi:10.1038/s41467-021-24533-7), 2021-07-14
Supplement: 41467_2021_24533_MOESM2_ESM.pdf [file 41467_2021_24533_MOESM2_ESM.pdf]

## **Description of Additional Supplementary Files**

File name: Supplementary Data 1:

Description: Compilation of subducting slab specific water and carbon fluxes

File name: Supplementary Data 2:

Description: Subducting slab specific carbon recycling

File name: Supplementary Data 3:

Description: Comparison of carbon recycling efficiency with CO<sub>2</sub> outputs from strong emitter volcanoes
